# Supplementary material for: Greater adherence to the Healthy Nordic Food Index is associated with lower all-cause mortality in a population-based sample from northern Germany
Source: PubMed Central journal article supplement (PMC10899306; doi:10.1007/s00394-023-03271-0), 2023-10-19
Supplement: 394_2023_3271_MOESM1_ESM.pdf [file 394_2023_3271_MOESM1_ESM.pdf]

# **Greater adherence to the Healthy Nordic Food Index is associated with lower all-cause mortality in a population-based sample from northern Germany**

European Journal of Nutrition

Paula Stürmer, Ilka Ratjen, Katharina Susanne Weber, Cara Övermöhle, Tatjana Patricia Liedtke, Sabina Waniek, Eike Andreas Strathmann, Wolfgang Lieb

Corresponding author: Paula Stürmer, Institute of Epidemiology, Kiel University, Niemannsweg 11, 24105 Kiel, Germany, paula.stuermer@epi.uni-kiel.de

**Online Resource 1:** Characterisation of participants of the “popgen controls” included vs. excluded from the analysis associating dietary patterns with all-cause mortality.

|                                            | Included (n=863)        | Excluded <sup>1</sup> (n=99) | <i>p</i> value   |
|--------------------------------------------|-------------------------|------------------------------|------------------|
| <b>Female sex<sup>2</sup>, n (%)</b>       | 366 (43.8%)             | 35 (36.5%)                   | 0.1700           |
| <b>Age<sup>3</sup> in years</b>            | 62.4 [55.1; 71.1]       | 51.1 [37.0; 64.5]            | <b>&lt;.0001</b> |
| <b>BMI<sup>4</sup> in kg/m<sup>2</sup></b> | 26.7 [24.3; 29.7]       | 27.3 [24.7; 30.1]            | 0.3064           |
| <b>Energy intake in kcal/d</b>             | 2106.7 [1753.6; 2564.2] | 2605.6 [1977.2; 4043.6]      | <b>&lt;.0001</b> |
| <b>Alcohol intake in g/d</b>               | 8.7 [3.2; 18.2]         | 10.6 [3.2; 23.4]             | 0.1473           |
| <b>Smoking<sup>5</sup></b>                 |                         |                              | <b>0.0130</b>    |
| <b>Never, n (%)</b>                        | 353 (42.2%)             | 36 (39.6%)                   |                  |
| <b>Current, n (%)</b>                      | 109 (13.0%)             | 22 (24.2%)                   |                  |
| <b>Former, n (%)</b>                       | 374 (44.7%)             | 33 (36.3%)                   |                  |
| <b>Education<sup>6</sup></b>               |                         |                              | <b>0.0465</b>    |
| <b>&lt;=9 years, n (%)</b>                 | 287 (34.3%)             | 34 (35.8%)                   |                  |
| <b>10 years, n (%)</b>                     | 281 (33.6%)             | 21 (22.1%)                   |                  |
| <b>&gt;=11 years, n (%)</b>                | 268 (32.1%)             | 40 (42.1%)                   |                  |

<sup>1</sup> Excluded from final study population due to missing physical examination data, or missing data on sex, education, and smoking status, as well as due to implausible energy intake (women: <500 or >3500 kcal/d; men: <800 or >4000 kcal/d (Willet 2013)) or loss to follow-up.

<sup>2</sup> In group of excluded participants due to missing data, here n=96.

<sup>3</sup> In group of excluded participants missing information on age was calculated based on data from self-administered questionnaires, as participants did not take part in the physical examination.

<sup>4</sup> In group of excluded participants due to missing data (participants did not take part in the physical examination), here n=88.

<sup>5</sup> In group of excluded participants due to missing data, here n=91.

<sup>6</sup> In group of excluded participants due to missing data, here n=95.

## Online Resource 2: Food items contributing to food groups used to calculate dietary pattern scores.

| <b>Dietary Approaches to Stop Hypertension score</b> |                                                                                                                                                                                                                                       |
|------------------------------------------------------|---------------------------------------------------------------------------------------------------------------------------------------------------------------------------------------------------------------------------------------|
| Fruits <sup>1</sup>                                  | Apple, pear, orange, mandarin, kiwi, pineapple, banana, fig, physalis, pomegranate, cherry, plum, apricot, mirabelle, nectarine, peach, berries, melon, grape, mixed fruits, dried fruits, olives                                     |
| Vegetables <sup>1</sup>                              | Carrot, kohlrabi, tomato, pepper, cucumber, gherkin, avocado, green salad, onion, garlic, sauerkraut, spinach, broccoli, cauliflower, white and red cabbage, kale, brussel sprouts, asparagus, aubergine, courgette, mixed vegetables |
| Nuts and legumes <sup>1</sup>                        | Beans, chickpeas, peas, lentils, nuts, seeds, tofu                                                                                                                                                                                    |
| Low-fat dairy products <sup>1</sup>                  | Milk, dairy drink (fat content: 0.3% and 1.5%, respectively), (fruit) yogurt, buttermilk (fat content: 0.1 %, 0.3% and 1.5%, respectively), low-fat soft and hard cheese                                                              |
| Whole grains <sup>1</sup>                            | Bread and bread rolls (grey, rey, brown, wholegrain), crispbread                                                                                                                                                                      |
| Dietary sodium <sup>2</sup>                          | Sodium                                                                                                                                                                                                                                |
| Red and processed meat <sup>2</sup>                  | Pork, beef, lamb, game, offal                                                                                                                                                                                                         |
| Sweetened beverages <sup>2</sup>                     | Lemonade, soft drinks                                                                                                                                                                                                                 |
| <b>Modified Mediterranean Diet Score</b>             |                                                                                                                                                                                                                                       |
| Fruits and nuts <sup>1</sup>                         | Apple, pear, orange, mandarin, kiwi, pineapple, banana, fig, physalis, pomegranate, cherry, plum, apricot, mirabelle, nectarine, peach, berries, melon, grape, mixed fruits, dried fruits, nuts, seeds                                |
| Vegetables <sup>1</sup>                              | Carrot, kohlrabi, tomato, pepper, cucumber, gherkin, avocado, green salad, onion, garlic, sauerkraut, spinach, broccoli, cauliflower, white and red cabbage, kale, brussel sprouts, asparagus, aubergine, courgette, mixed vegetables |
| Legumes <sup>1</sup>                                 | Beans, chickpeas, peas, lentils                                                                                                                                                                                                       |
| Fish and seafood <sup>1</sup>                        | Fish, ready-to-eat fish dishes, mussels, crustaceans                                                                                                                                                                                  |
| Cereals <sup>1</sup>                                 | Bread, bread roll, crispbread, potatoes, potato products, rice, pasta, grains, breakfast cereals, doughs, savoury biscuits                                                                                                            |
| Meat and poultry <sup>2</sup>                        | Pork, beef, poultry, lamb, calf, rabbit, game, sausages, offal                                                                                                                                                                        |
| Dairy products <sup>2</sup>                          | Milk, dairy drinks, buttermilk, yogurt, sour milk, kefir, fruit yogurt, cream, crème fraîche, cream cheese, cottage cheese, soft and hard cheese, acid curd cheese, desserts                                                          |
| Ratio unsaturated:saturated fatty acids <sup>1</sup> | Polyunsaturated fatty acids, monounsaturated fatty acids, saturated fatty acids                                                                                                                                                       |
| Alcohol                                              | Beer, Wheat beer, stout, wine (white, rosé, red, sparkling), liqueurs, spirits, mixed alcoholic drinks                                                                                                                                |
| <b>Healthy Nordic Food Index</b>                     |                                                                                                                                                                                                                                       |
| Apples and pears <sup>1</sup>                        | Apple, pear                                                                                                                                                                                                                           |
| Cabbage <sup>1</sup>                                 | Sauerkraut, broccoli, cauliflower, white and red cabbage, kale, brussel sprouts                                                                                                                                                       |
| Root vegetables <sup>1</sup>                         | Carrot                                                                                                                                                                                                                                |
| Fish <sup>1</sup>                                    | Fish, ready-to-eat fish dishes                                                                                                                                                                                                        |
| Oats and cereals <sup>1</sup>                        | Oats, other breakfast cereals                                                                                                                                                                                                         |
| Wholegrain bread <sup>1</sup>                        | Wholegrain bread and bread rolls                                                                                                                                                                                                      |

<sup>1</sup> Food groups scored positively for calculation of dietary pattern score.

<sup>2</sup> Food groups scored negatively for calculation of dietary pattern score.

**Online Resource 3:** Characterization of median daily macronutrient intake and intake of food groups of the study sample used to calculate dietary pattern scores stratified by mortality status at mortality follow-up.

|                                                                 | All (n=836)                      | Deceased <sup>5</sup> (n=93)     | Alive <sup>5</sup> (n=743)     |
|-----------------------------------------------------------------|----------------------------------|----------------------------------|--------------------------------|
| <b>Macronutrients [g/d]<sup>4</sup></b>                         |                                  |                                  |                                |
| <b>Protein</b>                                                  | 77.0 [70.4; 84.2]                | 77.8 [70.8; 88.7]                | 76.8 [70.3; 83.8]              |
| <b>Carbohydrates</b>                                            | 220.4 [202.6; 238.5]             | 222.4 [197.6; 238.8]             | 220.4 [203.2; 238.5]           |
| <b>Fat</b>                                                      | 97.8 [91.3; 105.1]               | 98.7 [90.5; 107.9]               | 97.8 [91.4; 104.5]             |
| <b>Fiber</b>                                                    | 21.4 [19.0; 24.5]                | 21.9 [18.5; 24.9]                | 21.4 [19.1; 24.4]              |
| <b>Alcohol<sup>2</sup></b>                                      | 10.5 [5.5; 18.5]                 | 10.7 [3.6; 16.2]                 | 10.5 [5.7; 18.7]               |
| <b>Food groups [g/d]<sup>4</sup> or [mL/d]<sup>4</sup></b>      |                                  |                                  |                                |
| <b>Fruits<sup>1</sup></b>                                       | 184.0 [130.8; 292.3]             | 191.1 [131.9; 315.9]             | 183.9 [130.7; 291.2]           |
| <b>Fruits and nuts<sup>2</sup></b>                              | 186.6 [132.8; 300.5]             | 193.9 [141.1; 318.1]             | 185.4 [132.2; 297.1]           |
| <b>Apples and pears<sup>3</sup></b>                             | 74.9 [31.5; 224.1]               | 76.6 [32.0; 224.1]               | 74.8 [31.5; 224.1]             |
| <b>Vegetables<sup>1,2</sup></b>                                 | 180.5 [146.8; 218.0]             | 174.5 [153.3; 212.3]             | 181.4 [145.8; 218.1]           |
| <b>Root vegetables<sup>3</sup></b>                              | 18.4 [14.6; 28.5]                | 17.3 [12.1; 12.1]                | 18.5 [14.8; 28.9]              |
| <b>Cabbage<sup>3</sup></b>                                      | 23.3 [18.1; 30.3]                | 23.4 [18.0; 31.4]                | 23.3 [18.1; 30.0]              |
| <b>Legumes<sup>2</sup></b>                                      | 1.9 [1.2; 4.1]                   | 2.2 [1.5; 6.1]                   | 1.9 [1.2; 3.9]                 |
| <b>Nuts and legumes<sup>1</sup></b>                             | 6.7 [4.6; 10.6]                  | 7.3 [4.3; 10.6]                  | 6.7 [4.6; 10.7]                |
| <b>Cereals<sup>2</sup></b>                                      | 149.0 [115.4; 181.9]             | 143.7 [109.1; 176.6]             | 149.5 [116.0; 183.2]           |
| <b>Whole grains<sup>1</sup></b>                                 | 67.5 [48.9; 85.0]                | 64.5 [51.4; 86.1]                | 68 [48.8; 84.9]                |
| <b>Wholegrain bread<sup>3</sup></b>                             | 30.8 [18.9; 44.4]                | 29.4 [18.4; 43.6]                | 31.1 [19.0; 44.4]              |
| <b>Oats and cereals<sup>3</sup></b>                             | 0.9 [0.2; 6.6]                   | 0.4 [0.0; 2.5]                   | 1.1 [0.3; 6.6]                 |
| <b>Dairy products<sup>2</sup></b>                               | 228.4 [154.7; 336.0]             | 246.9 [164.2; 358.1]             | 225.8 [154.3; 333.0]           |
| <b>Low-fat dairy products<sup>1</sup></b>                       | 14.6 [0.7; 68.3]                 | 13.3 [0.7; 55.0]                 | 15.3 [0.7; 72.2]               |
| <b>Meat and poultry<sup>2</sup></b>                             | 109.2 [80.6; 140.4]              | 113.6 [84.1; 161.6]              | 108.5 [79.3; 139.4]            |
| <b>Red and processed meat<sup>1</sup></b>                       | 45.3 [27.3; 66.3]                | 53.4 [30.8; 77.7]                | 44.6 [27.0; 65.1]              |
| <b>Fish<sup>3</sup></b>                                         | 23.0 [11.7; 37.6]                | 20.1 [9.1; 34.8]                 | 23.1 [12.0; 37.7]              |
| <b>Fish and seafood<sup>2</sup></b>                             | 23.7 [12.4; 38.3]                | 20.8 [9.8; 35.5]                 | 23.8 [12.7; 38.4]              |
| <b>Sweetened beverages<sup>1</sup></b>                          | 70.8 [-20.4; 153.9] <sup>6</sup> | 58.1 [-53.6; 152.5] <sup>6</sup> | 73.7 [-17; 153.9] <sup>6</sup> |
| <b>Ratio unsaturated:<br/>saturated fatty acids<sup>2</sup></b> | 1.3 [1.2; 1.5]                   | 1.3 [1.1; 1.5]                   | 1.3 [1.2; 1.5]                 |
| <b>Dietary sodium<sup>1</sup></b>                               | 2.3 [2.1; 2.5]                   | 2.4 [2; 2.6]                     | 2.3 [2.1; 2.5]                 |

<sup>1</sup> Food group included in Dietary Approaches to Stop Hypertension score.

<sup>2</sup> Food group included in Modified Mediterranean Diet Score.

<sup>3</sup> Food group included in Healthy Nordic Food Index.

<sup>4</sup> Intake adjusted for total energy intake using residual method and subsequent addition of a constant based on mean energy intake of the study population. Dietary assessment was undertaken at the second examination cycle of the popgen control cohort.

<sup>5</sup> At mortality follow-up in 2022.

<sup>6</sup> Negative values due to high standard deviation caused by an intake of >1.8L soft drinks/d in ~1% of the study population.

**Online Resource 4:** Association of energy-adjusted food groups comprising the Healthy Nordic Food Index with all-cause mortality using Cox proportional hazard regression models.

|                         | Low intake (< Median) <sup>1</sup> | High intake (≥ Median)  |
|-------------------------|------------------------------------|-------------------------|
| <b>Cabbage</b>          |                                    |                         |
| Individuals, n (%)      | 418 (50.0%)                        | 418 (50.0%)             |
| Deceased, n (%)         | 48 (11.4%)                         | 45 (10.8%)              |
| Model 1                 | Ref.                               | 0.83 [0.55–1.24]        |
| Model 2                 | Ref.                               | 0.89 [0.59–1.35]        |
| <b>Root vegetables</b>  |                                    |                         |
| Individuals, n (%)      | 418 (50.0%)                        | 418 (50.0%)             |
| Deceased, n (%)         | 51 (12.2%)                         | 42 (10.1%)              |
| Model 1                 | Ref.                               | 0.79 [0.53–1.19]        |
| Model 2                 | Ref.                               | 0.81 [0.54–1.23]        |
| <b>Apples and pears</b> |                                    |                         |
| Individuals, n (%)      | 418 (50.0%)                        | 418 (50.0%)             |
| Deceased, n (%)         | 46 (11.0%)                         | 47 (11.2%)              |
| Model 1                 | Ref.                               | 0.76 [0.50–1.15]        |
| Model 2                 | Ref.                               | 0.80 [0.52–1.23]        |
| <b>Fish</b>             |                                    |                         |
| Individuals, n (%)      | 418 (50.0%)                        | 418 (50.0%)             |
| Deceased, n (%)         | 53 (12.7%)                         | 40 (9.6%)               |
| Model 1                 | Ref.                               | 0.67 [0.44–1.00]        |
| Model 2                 | Ref.                               | 0.69 [0.45–1.04]        |
| <b>Oats and cereals</b> |                                    |                         |
| Individuals, n (%)      | 418 (50.0%)                        | 418 (50.0%)             |
| Deceased, n (%)         | 61 (14.6%)                         | 32 (7.7%)               |
| Model 1                 | Ref.                               | <b>0.55 [0.36–0.85]</b> |
| Model 2                 | Ref.                               | <b>0.59 [0.38–0.91]</b> |
| <b>Wholegrain bread</b> |                                    |                         |
| Individuals, n (%)      | 418 (50.0%)                        | 418 (50.0%)             |
| Deceased, n (%)         | 50 (12.0%)                         | 43 (10.3%)              |
| Model 1                 | Ref.                               | 0.92 [0.61–1.39]        |
| Model 2                 | Ref.                               | 0.92 [0.61–1.40]        |

<sup>1</sup> Low intake group (intake < sample median) was set as reference.

For survival analyses, intake of food groups was adjusted for energy intake by residual method and subsequent addition of a constant based on mean energy intake of the study population.

Associations are in Hazard Ratios [95% Confidence Interval]. Bold values indicate significant associations.

Model 1: adjusted for sex and age.

Model 2: Model 1 further adjusted for Body Mass Index, Waist to Hip Ratio, education, smoking status, total energy intake, and physical activity.

**Online Resource 5:** Association of variations of the energy-adjusted HNFI with all-cause mortality using Cox proportional hazard regression models after separate exclusion of each single food group from the full score.

|                                    | 1-SD increment          |
|------------------------------------|-------------------------|
| <b>Full HNFI</b>                   |                         |
| Model 1                            | 0.76 [0.62–0.94]        |
| Model 2                            | 0.79 [0.64–0.98]        |
| <b>HNFI minus cabbage</b>          |                         |
| Model 1                            | 0.77 [0.62–0.95]        |
| Model 2                            | 0.80 [0.64–1.00]        |
| <b>HNFI minus root vegetables</b>  |                         |
| Model 1                            | 0.79 [0.64–0.97]        |
| Model 2                            | <b>0.88 [0.71–1.10]</b> |
| <b>HNFI minus apples and pears</b> |                         |
| Model 1                            | 0.75 [0.75–0.92]        |
| Model 2                            | 0.77 [0.62–0.96]        |
| <b>HNFI minus fish</b>             |                         |
| Model 1                            | 0.80 [0.80–0.98]        |
| Model 2                            | <b>0.85 [0.69–1.06]</b> |
| <b>HNFI minus oats and cereals</b> |                         |
| Model 1                            | 0.80 [0.80–0.99]        |
| Model 2                            | <b>0.86 [0.69–1.07]</b> |
| <b>HNFI minus wholegrain bread</b> |                         |
| Model 1                            | 0.74 [0.74–0.91]        |
| Model 2                            | 0.76 [0.61–0.94]        |

*Model 1: adjusted for sex and age.*

*Model 2: Model 1 further adjusted for Body Mass Index, Waist to Hip Ratio, education, smoking status, total energy intake, physical activity, and respective excluded food group.*

*Bold Hazard Ratios [95% Confidence Interval] indicate an association of modified HNFI with mortality risk that fails to reach statistical significance ( $p > 0.05$ ).*

*HNFI, Healthy Nordic Food Index; SD, standard deviation.*
